# Supplementary material for: Integrative Analysis of Transcriptome and Metabolome Sheds Light on Flavonoid Biosynthesis in the Fruiting Body of Stropharia rugosoannulata
Source: MDPI journal article supplement (doi:10.3390/jof10040254), 2024-03-27
Supplement: s1 [file s1]

**Figure S1.** Diagram of the total ion current for sample quality spectrum analysis.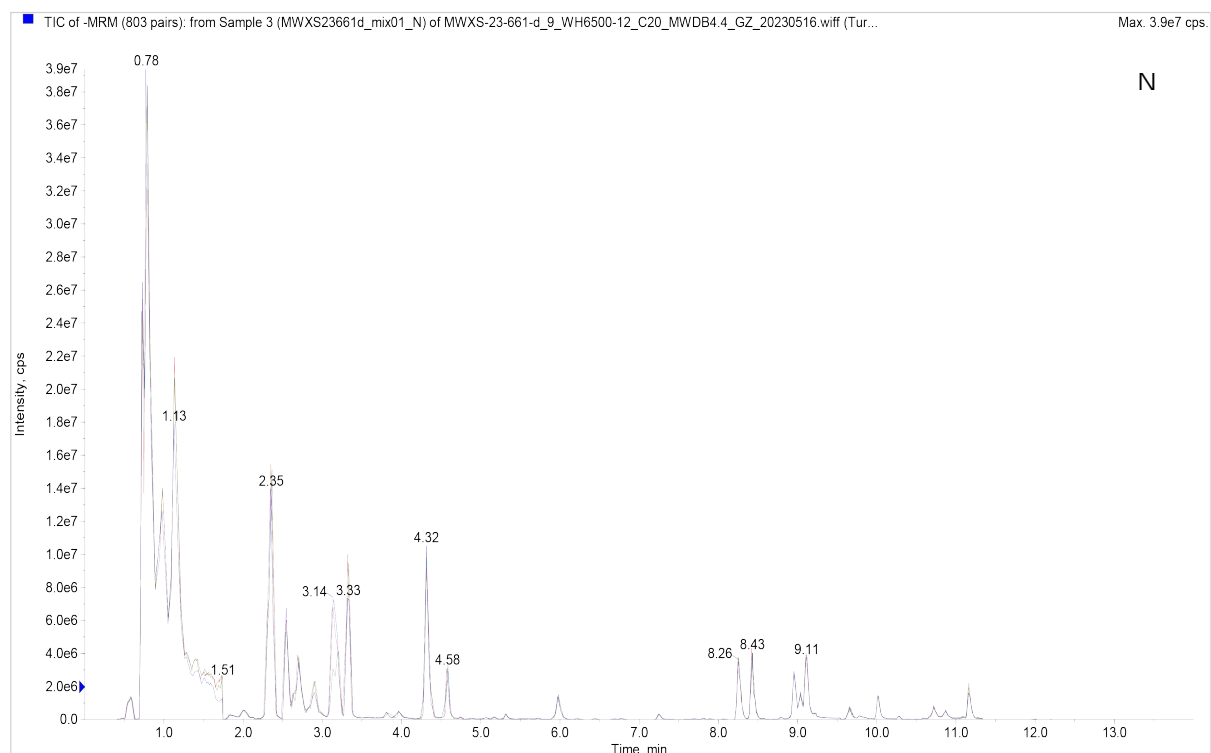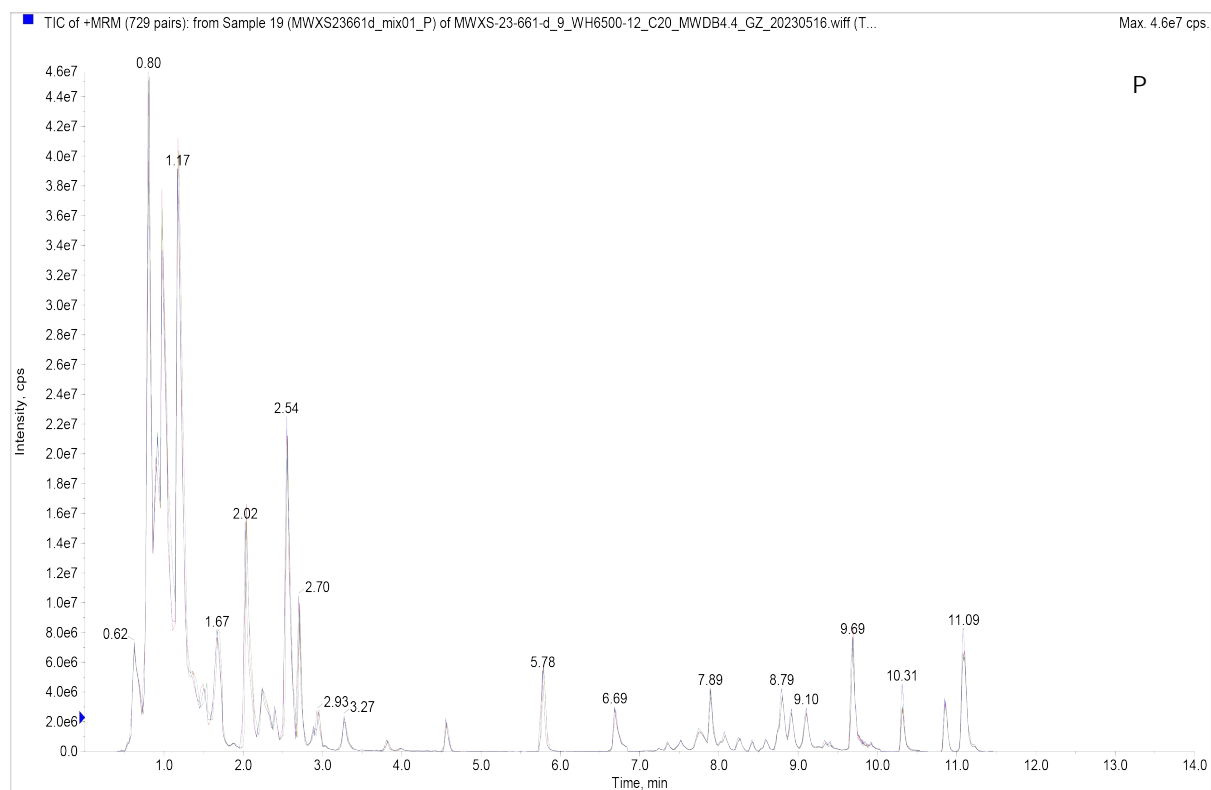

Note: The x-coordinate was the retention time (min) of the metabolite detection and the y-coordinate was the ion current intensity (cps) of a metabolite ion detection.
