# Supplementary figures and images for: Integrative Analysis of Transcriptome and Metabolome Sheds Light on Flavonoid Biosynthesis in the Fruiting Body of Stropharia rugosoannulata
Source: MDPI journal article supplement (doi:10.3390/jof10040254), 2024-03-27

Figure S2. Parameters and permutation test for the OPLS-DA model.

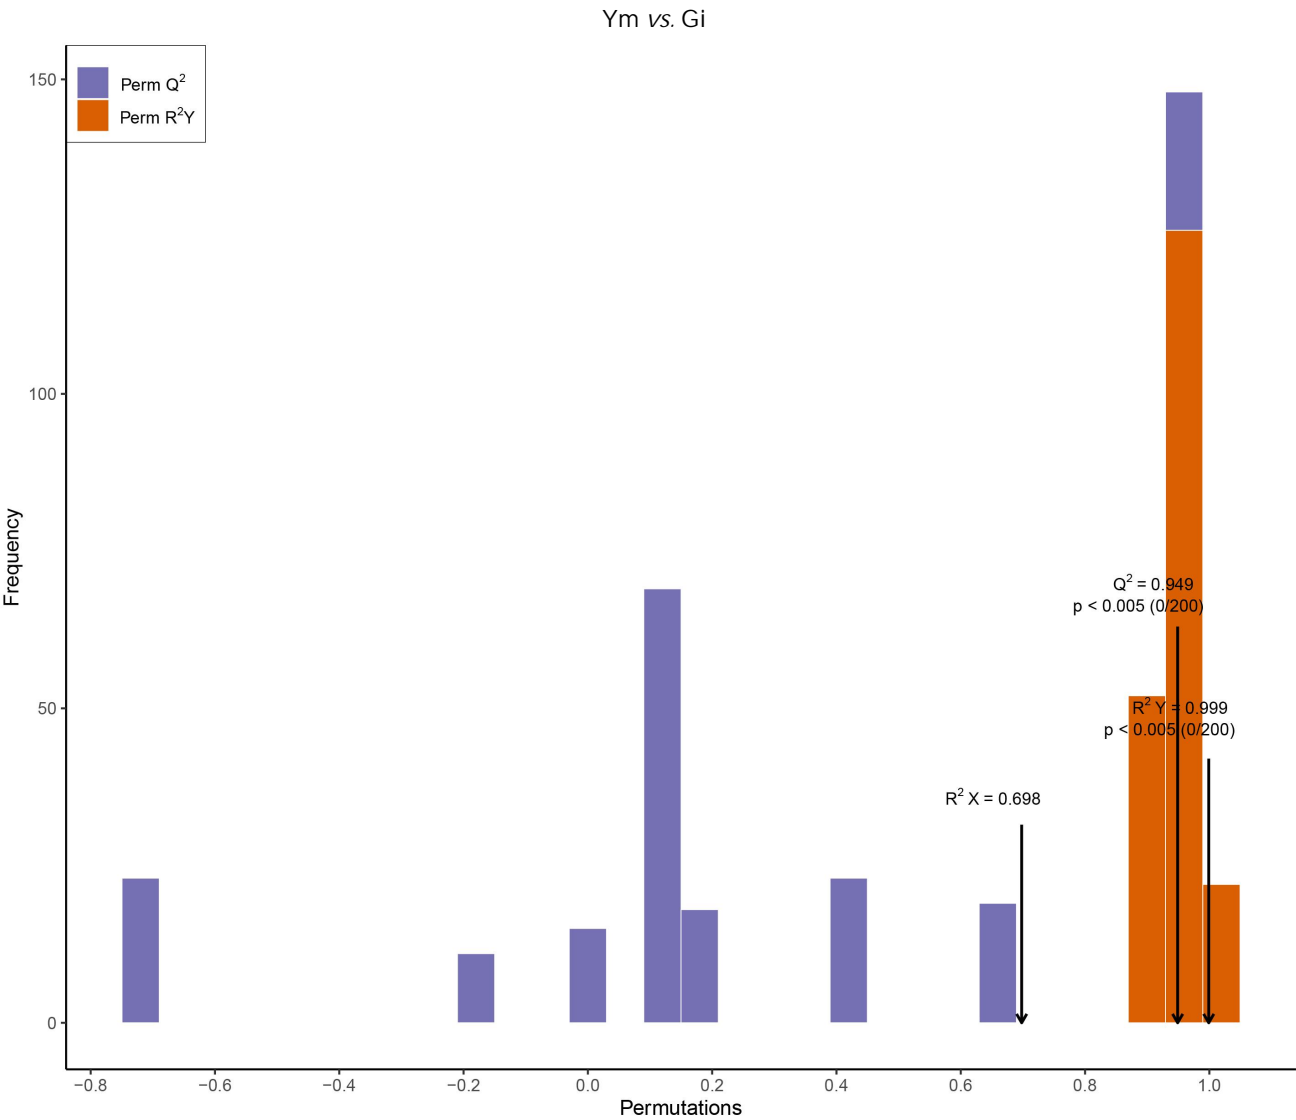

Gi vs. Ma

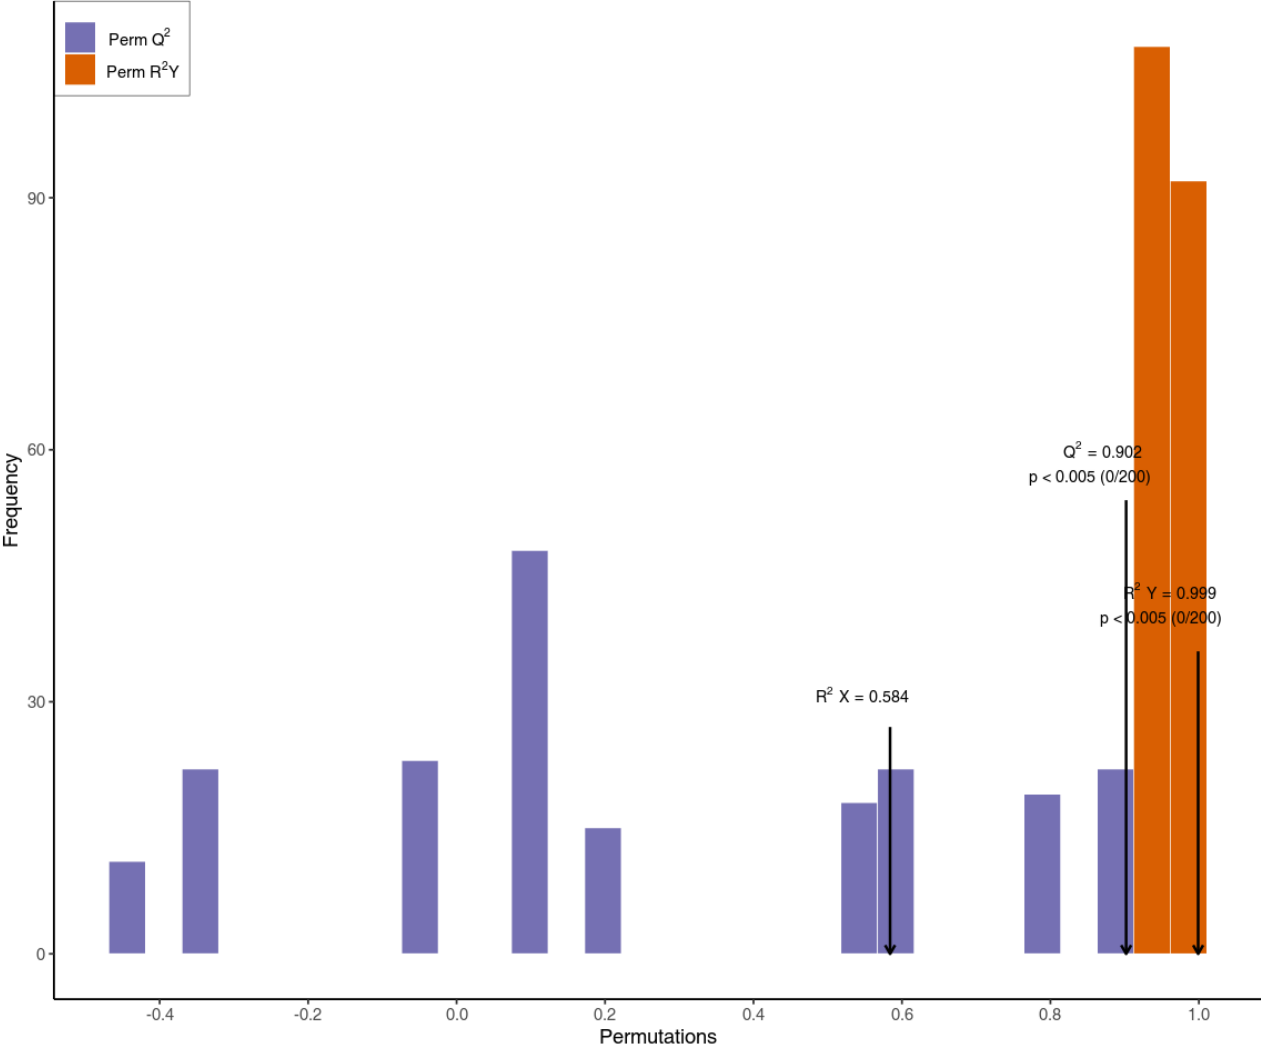

# Ym vs. Ma

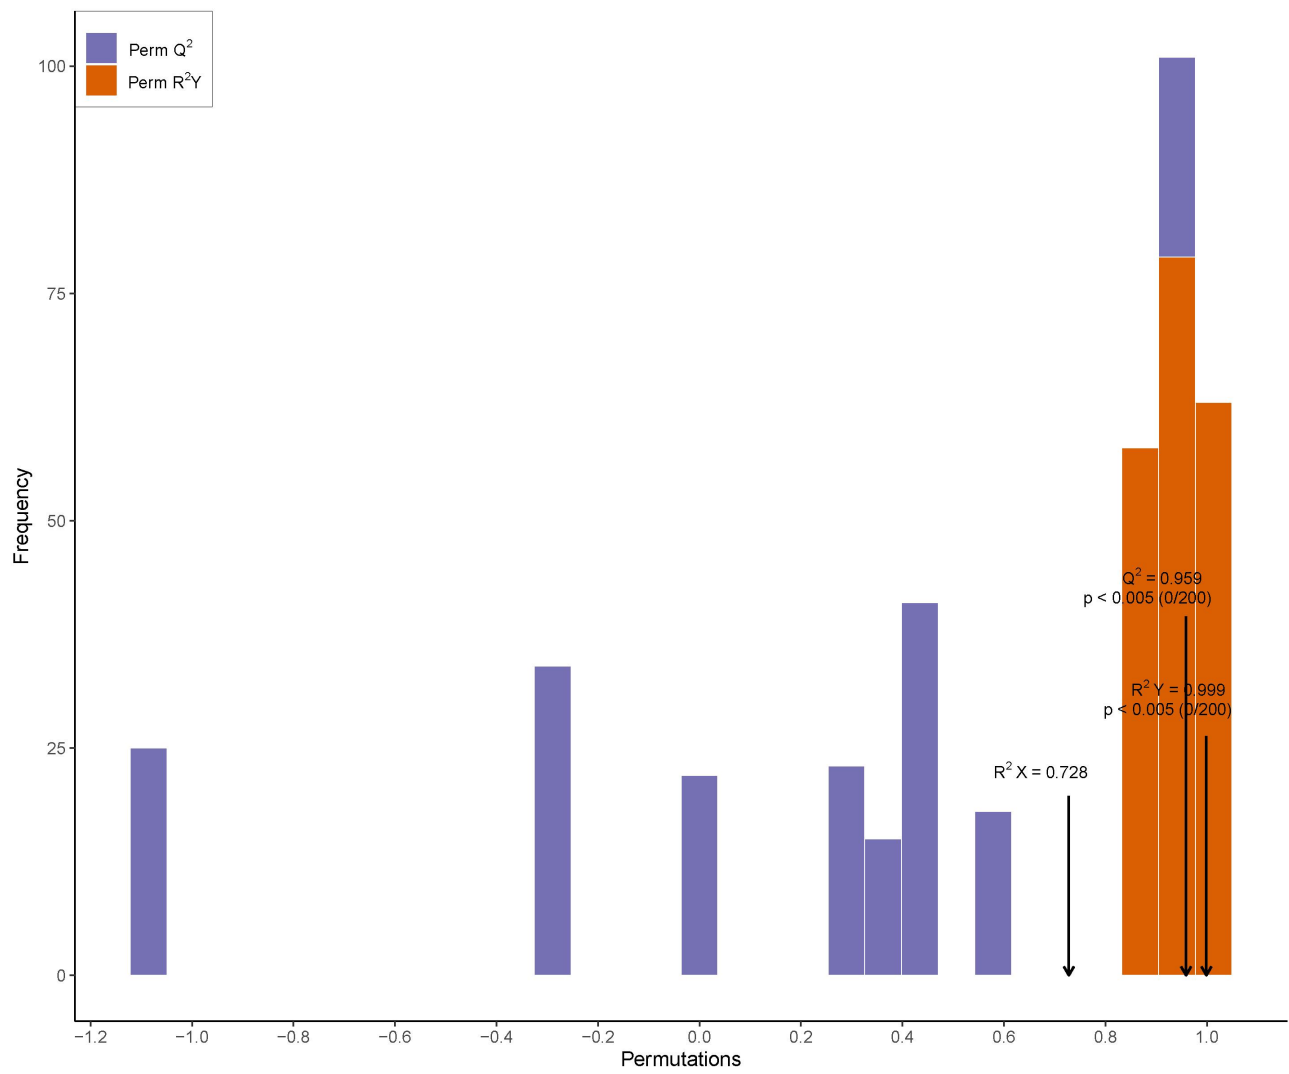

Supplement: s1 [file s1]
